# Supplementary material for: The properties of porous silicon as a therapeutic agent via the new photodynamic therapy
Source: Royal Society of Chemistry journal article supplement (doi:10.1039/b700892a), 2007-01-01
Supplement: b700892a.pdf [file b700892a.pdf]

### Appendix 1. The intensity of a single-phase powder specimen in an X-ray diffractometer

The exact expression for the intensity of a single-phase powder specimen in an X-ray diffractometer<sup>23</sup> is

$$I = \left( \frac{I_0 A \lambda^3}{32\pi r} \right) \left[ \left( \frac{\mu_0}{4\pi} \right)^2 \frac{e^4}{m^2} \right] \left( \frac{1}{v^2} \right) \left[ |F|^2 p \left( \frac{1 + \cos^2 2\theta}{\sin^2 \theta \cos \theta} \right) \right] \left( \frac{e^{-2M}}{2\mu} \right). \quad (1)$$

Here  $I$  = integrated intensity per unit length of diffraction line ( $\text{joules sec}^{-1}\text{m}^{-1}$ ),  $I_0$  = intensity of incident beam ( $\text{joules sec}^{-1}\text{m}^{-1}$ ),  $A$  = cross-sectional area of incident beam ( $\text{m}^2$ ),  $\lambda$  = wavelength of incident beam (m),  $r$  = radius of diffractometer circle (m),  $\mu_0 = 4\pi \times 10^{-7} \text{ m kg C}^{-2}$ ,  $e$  = charge on electron (C),  $m$  = mass of electron (kg),  $v$  = volume of unit cell ( $\text{m}^3$ ),  $F$  = structure factor,  $p$  = multiplicity factor,  $\theta$  = Bragg angle,  $e^{-2M}$  = temperature factor, and  $\mu$  = linear absorption coefficient ( $\text{m}^{-1}$ ), which enters as the absorption factor  $1/2\mu$ . If we put

$$K = \left( \frac{I_0 A \lambda^3}{32\pi r} \right) \left[ \left( \frac{\mu_0}{4\pi} \right)^2 \frac{e^4}{m^2} \right] \quad (2)$$

and

$$R = \left( \frac{1}{v^2} \right) \left[ |F|^2 p \left( \frac{1 + \cos^2 2\theta}{\sin^2 \theta \cos \theta} \right) \right] e^{-2M}, \quad (3)$$

the diffracted intensity is then given by

$$I = \frac{KR}{2\mu} \quad (4)$$

where  $K$  is a constant if the XRD test condition is fixed,  $R_i$  depends on the kind and crystallographic orientation of the diffracting substance of the  $i$ th layer, and  $\mu$  is the absorption coefficient of the diffraction substance.<sup>23</sup>

For the  $i$ th element of a multicomponent system composed of many elements Eq. 4 can be written as

$$I_i = \frac{KR_i}{2\mu_m} C_i \quad (5)$$

where  $C_i$  denotes the volume fraction of the  $i$ th element and  $\mu_m$  the absorption coefficient of the multicomponent system.<sup>23</sup> Since absorption is an atomic process, the multicomponent system can be regarded as slabs of each of pure elements as many as the number of the components, that is, a multilayer system.<sup>24</sup> In analogy with the expression of Eq. 5, for the  $i$ th layer of a multilayer system Eq. 4 can therefore be expressed as

$$I_i = \frac{KR_i}{2\mu_T} C_i \quad (6)$$

where  $C_i$  denotes the volume fraction of the  $i$ th layer and  $\mu_T$  the absorption coefficient of the total multilayer system.

## Appendix 2. Calculation of the absorption coefficient of the Fe<sub>3</sub>O<sub>4</sub> / Fe / Si (100) sample

For a multilayer system the absorption coefficient of the system can be expressed as

$$\mu_T = \sum_i \left[ \left( \frac{\mu}{\rho} \right)_i W_i \rho_T \right] \quad (1)$$

where  $\left( \frac{\mu}{\rho} \right)_i$  and  $W_i$  denote the mass absorption coefficient and weight fraction of the  $i$ th layer material, respectively and  $\rho_T$  the density of the total system.<sup>24</sup> We can write Eq. 2 for a multilayer system consisting of Fe<sub>3</sub>O<sub>4</sub> and Fe thin films and an Si substrate:

$$\mu_T = \sum_i \left[ \left( \frac{\mu}{\rho} \right)_{Fe_3O_4} W_{Fe_3O_4} + \left( \frac{\mu}{\rho} \right)_{Fe} W_{Fe} + \left( \frac{\mu}{\rho} \right)_{Si} W_{Si} \right] \rho_T \cdot (2)$$

In this system  $W_{Fe_3O_4} \approx W_{Fe} \approx 0$  and  $W_{Si} \approx 1$  because the  $Fe_3O_4$  and Fe layers are much thinner than the Si substrate, and there is little difference in the  $\frac{\mu}{\rho}$  value between them. The absorption coefficient of the sample  $\mu_T$  can therefore be approximated as

$$\mu_T \approx \left(\frac{\mu}{\rho}\right)_{Si} \rho_{Si} = \mu_{Si} . \quad (3)$$
